# Supplementary material
Source: PubMed Central journal article supplement (PMC8028887)

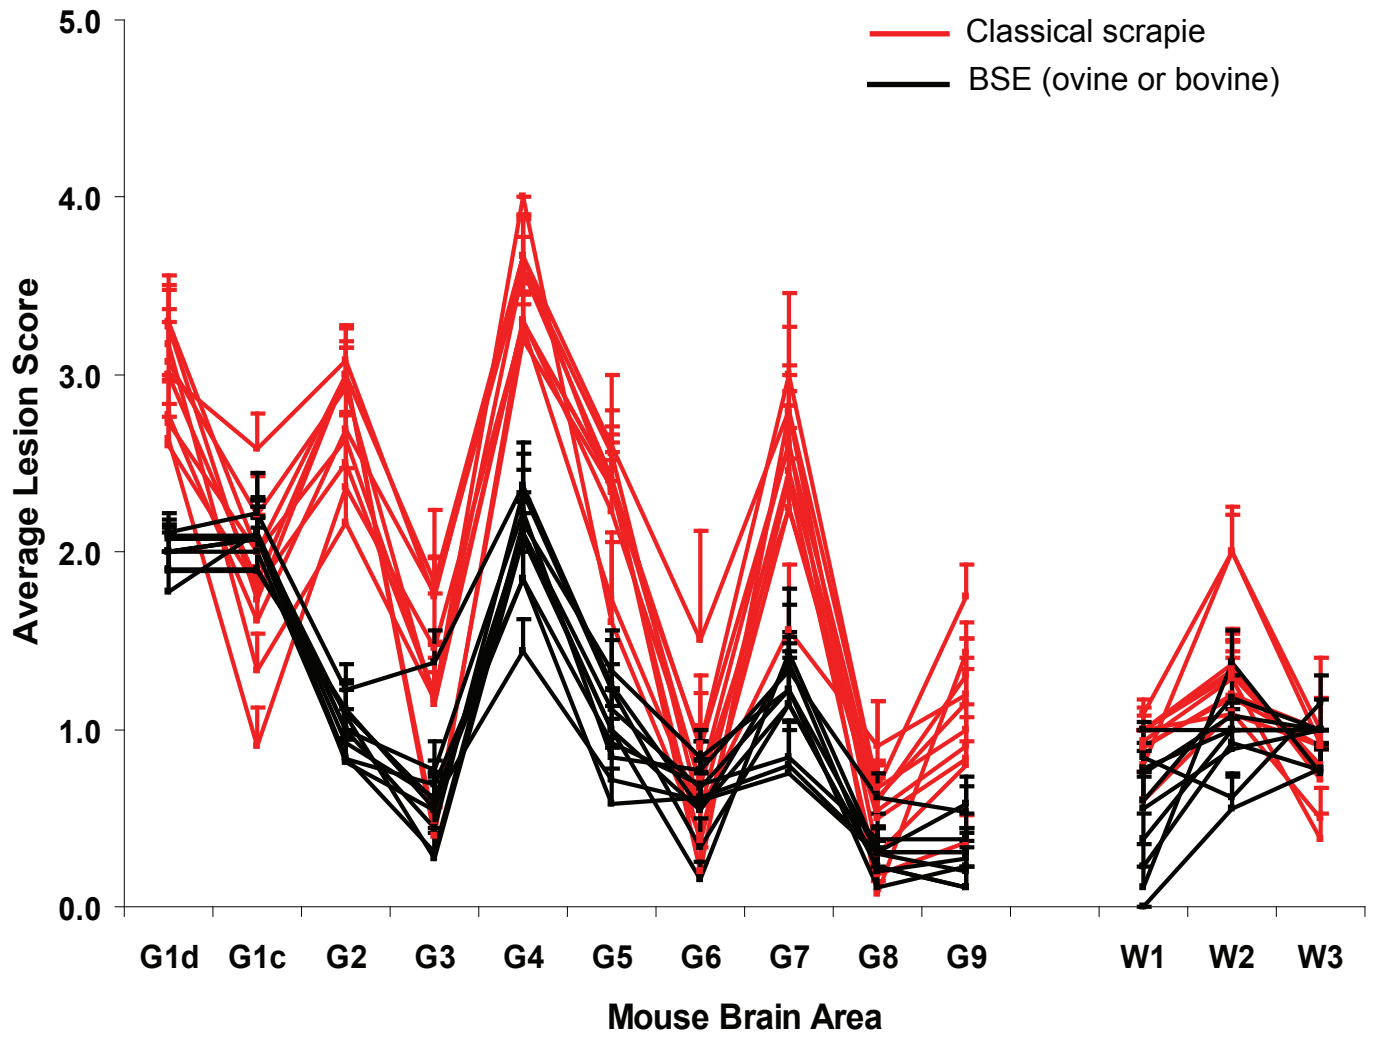

Supplement: BPA-22-265-s001.pdf [file BPA-22-265-s001.pdf]
