# Supplementary material
Source: PubMed Central journal article supplement (PMC8028887)

A 87A in C57BL

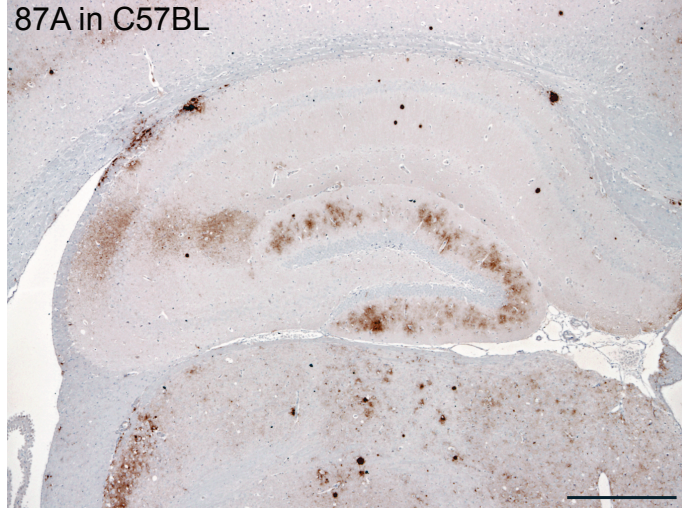

B 87V in VM

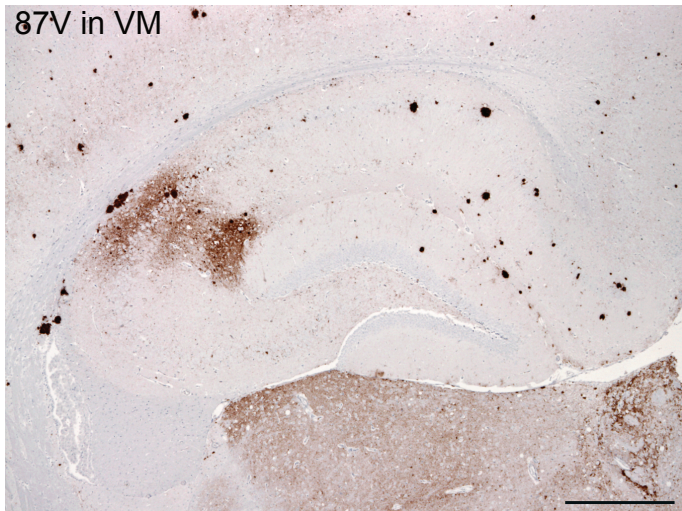

C ME7 in RIII

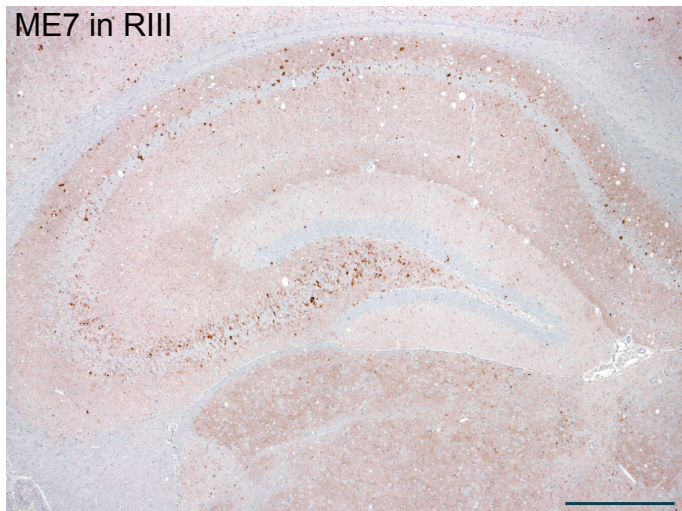

Supplement: BPA-22-265-s003.pdf [file BPA-22-265-s003.pdf]
